# Supplementary material
Source: PubMed Central journal article supplement (PMC3670391)
Supplement: 1302927110_pnas.201302927SI.pdf [file 1302927110_pnas.201302927SI.pdf]

# Supporting Information

Hughes et al. 10.1073/pnas.1302927110

## SI Materials and Methods

**Cell Lines and Plasmids.** Hct116 (J. Simon, Fred Hutchinson Cancer Research Center) and U2OS cells (American Type Culture Collection) were maintained in DMEM with 10% (vol/vol) FBS and penicillin/streptomycin. The cyclin-dependent kinase (Cdk) 2 plasmid was described (1) and the Cdk2AF expression plasmid was obtained from J. Roberts (Fred Hutchinson Cancer Research Center).

**Antibodies and immunocytochemistry.** The antibodies used were as follows: cyclin E (HE12 for Western Blotting, HE111 for immunoprecipitation, Santa Cruz Biotechnology), Cdk2 (Western blotting: M2, immunoprecipitation D-12; Santa Cruz Biotechnology), anti-Cdk1 phospho-Tyr15 (Calbiochem), phosphohistone H2A.X (JBW301; Millipore), histone H2A.X (07-627; Millipore), protein phosphatase 2A (PP2A) (610555; BD Biosciences), Mus81 (MTA30 2G10/3, Abcam), and anti-HA (12CA5). The cyclin A antibody was a gift from J. Roberts (Fred Hutchinson Cancer Research Center). Immunocytochemistry using anti-phosphohistone H2A.X antibody was performed according to manufacturer's instructions (Millipore).

**Flow Cytometry.** For  $\gamma$ H2AX staining, cells were harvested and fixed in 70% (vol/vol) ethanol overnight at 4 °C. Cells were washed twice in BSA-T-PBS [1% (vol/vol) BSA and 0.2% (vol/vol) Triton X-100 in PBS] and incubated with mouse  $\gamma$ H2AX antibody (1:500) for 1 h at room temperature (RT). Cells were washed twice in BSA-PBS and incubated with goat anti-mouse Alexa Fluor 488 conjugated secondary antibody (Invitrogen) for 30 min at RT. After washing twice in BSA-PBS, samples were stained with propidium iodide. For annexin V Apoptosis assay, cells were harvested by trypsinization, washed twice with PBS, and resuspended in 1× binding buffer (10 mM Hepes at pH 7.4, 140 mM NaCl, and 2.5 mM CaCl<sub>2</sub>) at a concentration of  $1 \times 10^6$  cells per mL, 100  $\mu$ L of cells were incubated with 5  $\mu$ L of FITC-annexin V antibody (BD Biosciences) and 5  $\mu$ g/mL propidium iodide for 15 min at RT. Four hundred microliters of 1× binding buffer was added, and cells were analyzed by flow cytometry.

**Immunoprecipitations, Immunoblotting, and Kinase Assays.** Cells were lysed in Nonidet P-40 lysis buffer [50 mM Tris-HCl at pH 8.0, 150 mM NaCl, and 1% (vol/vol) Nonidet P-40] supplemented with protease and phosphatase inhibitors. Lysates were normalized by Bradford assay and analyzed by immunoblotting as described (1). Histones were extracted by lysing cells in Triton extraction buffer [TEB: PBS containing 0.5% (vol/vol) Triton X-100, 2 mM PMSF, and 0.02% (wt/vol) NaN<sub>3</sub>]. After centrifugation of lysate at  $6,500 \times g$  for 10 min, nuclei were washed in TEB and resuspended in 0.2 M HCL at a density of  $4 \times 10^7$  nuclei per mL and incubated overnight at 4 °C. Samples were centrifuged at  $6,500 \times g$  for 10 min, and supernatant was neutralized with NaOH. Immunoprecipitation of Cdk2 was performed from whole-cell lysates for greater than 2 h at 4 °C by using Protein G beads. We noted that Cdk2AF did not immunoprecipitate as well as wt-Cdk2. For cyclin E and cyclin A kinase assays, histone H1 phosphorylation was measured. One hundred fifty micrograms of lysate (cyclin E) or 10  $\mu$ g of lysate (cyclin A) was immunoprecipitated at 4 °C for no more than 2 h. IPs were washed twice in Nonidet P-40 lysis buffer and once in kinase buffer (50 mM Hepes at pH 7.4, 10 mM MgCl<sub>2</sub>, and 1  $\mu$ M DTT). Beads

were resuspended in 25  $\mu$ L of reaction buffer [50 mM Hepes at pH 7.4, 10 mM MgCl<sub>2</sub>, 1  $\mu$ M DTT, 1  $\mu$ g/mL histone H1, 30  $\mu$ M ATP, and 0.2  $\mu$ Ci/ $\mu$ L ATP ( $\gamma$ <sup>32</sup>P; Perkin-Elmer)] and incubated at 37 °C for 30 min with intermittent mixing. Laemmli sample buffer was added, samples were boiled at 95 °C, and run on a 12% (wt/vol) polyacrylamide gel. Gels were dried and imaged by using film or a Typhoon Trio imager.

**Cyclin E Pulse-Chase Analysis.** Cells were starved in media without methionine for 20 min, labeled for 20 min in 0.3 mCi/mL Trans<sup>35</sup>-label (MP Biomedicals), and chased in normal media with 0.8 mg/mL methionine for the indicated times. Cells were harvested by trypsinization and lysed in Nonidet P-40 Lysis buffer. Extracts were precleared with protein A beads before immunoprecipitation with cyclin E antibody. Beads were washed three times with RIPA buffer, resuspended in Laemmli sample buffer, boiled at 95 °C, and run on an 8% (wt/vol) polyacrylamide gel. Gels were dried and imaged by using a Typhoon Trio imager.

**Quantitative PCR Assays.** Total RNA was isolated from cells by using TRIzol Reagent according to the manufacturer's instructions (Life Technologies). RNA was treated with DNase and cDNA was synthesized with the High Capacity Reverse Transcription Kit (Applied Biosystems). Quantitative PCR was performed by using Taqman Universal PCR Master Mix and cyclin E specific Taqman gene expression assay on a ABI Prism 7700 (Applied Biosystems).

**Microfluidics-Assisted Replication Track Analysis.** Microchannel fabrication, DNA fiber stretching, and replication track analysis was done as described (2, 3). Labeling of cells was done as described in figure legends. Percent origin firing was calculated as (number of tracks with three consecutive segments IdU-EdU-IdU/total number of tracks counted)  $\times$  100. Mean EdU segment lengths of EdU-IdU tracks were used to derive fork progression rate (kilobases per minute), with the conversion factor 1  $\mu$ m = 3.9 kb and labeling interval, 30 min, as a denominator. The presented values are averages of fork rates across three experiments. Percent of ongoing forks was calculated as [number of EdU-IdU tracks/(number of EdU-only tracks + number of EdU-IdU tracks)]  $\times$  100. Statistical significance of the differences in origin firing frequencies and percent ongoing forks was determined by Student's *t* tests. For track measurements in normal replication (Fig. 1D), lengths of EdU and IdU segments in EdU-IdU tracks were quantified and plotted as frequency distributions. For track length measurements in the presence of HU, EdU segments in EdU-IdU tracks of untreated cells or HU-treated cells were quantified and plotted as frequency distributions (Fig. 5F). To determine statistical significance, the difference in length distributions of EdU segments in untreated vs. treated cells was evaluated by the Kolmogorov-Smirnov (KS) test (2). Values from three experiments were pooled. In both Cdk2<sup>+/+</sup> and Cdk2<sup>AF/AF</sup> cells, the difference between untreated and HU-treated EdU tracks was significant (*P* < 0.001) in both cell types. However, the *D*-statistic (maximal difference) was higher in the Cdk2<sup>AF/AF</sup> cells compared with the Cdk2<sup>+/+</sup> cells (0.4509 vs. 0.2102), indicating that the Cdk2<sup>AF/AF</sup> cells replicate DNA to a greater extent than Cdk2<sup>+/+</sup> cells in HU. Representative images of labeled tracks are shown in Fig. S8.
